# Supplementary material for: Structural and Biochemical Characterization of a Dye-Decolorizing Peroxidase from Dictyostelium discoideum
Source: MDPI journal article supplement (doi:10.3390/ijms22126265), 2021-06-10
Supplement: s1 [file s1]

# Supplementary information for

## Structural and Biochemical Characterization of a Dye-Decolorizing Peroxidase from *Dictyostelium discoideum*

Amrita Rai <sup>1,2</sup>, Johann P. Klare <sup>3</sup>, Patrick Y. A. Reinke <sup>1,4,5</sup>, Felix Englmaier <sup>6,7</sup>, Jörg Fohrer <sup>7,8</sup>, Roman Fedorov <sup>4</sup>,  
Manuel H. Taft <sup>1</sup>, Igor Chizhov <sup>1,4</sup>, Ute Curth <sup>1,4</sup>, Oliver Plettenburg <sup>6,7</sup> and Dietmar J. Manstein <sup>1,4,9,\*</sup>

- <sup>1</sup> Institute for Biophysical Chemistry, Hannover Medical School, Fritz Hartmann Centre for Medical Research  
Carl Neuberg Str. 1, D-30625 Hannover, Germany; Amrita.Rai@mpi-dortmund.mpg.de (A.R.);  
patrick.reinke@desy.de (P.Y.A.R.); Taft.Manuel@mh-hannover.de (M.H.T.);  
chizhov.igor@mh-hannover.de (I.C.); curth.ute@mh-hannover.de (U.C.)
- <sup>2</sup> Department of Structural Biochemistry, Max Planck Institute of Molecular Physiology,  
D-44227 Dortmund, Germany
- <sup>3</sup> Department of Physics, University of Osnabrueck, Barbarastrasse 7, D-49076 Osnabrück, Germany;  
jklare@uni-osnabrueck.de
- <sup>4</sup> Division for Structural Biochemistry, Hannover Medical School, Carl Neuberg Str. 1, D-30625 Hannover,  
Germany; Fedorov.Roman@mh-hannover.de
- <sup>5</sup> Center for Free-Electron Laser Science, German Electron Synchrotron (DESY), Notkestr. 85,  
D-22607 Hamburg, Germany
- <sup>6</sup> Institute of Medicinal Chemistry, Helmholtz Zentrum München (GmbH), German Research Center for  
Environmental Health, Ingolstädter Landstraße 1, D-85764 Neuherberg, Germany;  
felix.englmaier@helmholtz-muenchen.de (F.E.); oliver.plettenburg@oci.uni-hannover.de (O.P.)
- <sup>7</sup> Center of Biomolecular Drug Research (BMWZ), Institute of Organic Chemistry, Leibniz University  
Hannover, Schneiderberg 1b, D-30167 Hannover, Germany; joerg.fohrer@tu-darmstadt.de
- <sup>8</sup> Department of Chemistry, Clemens-Schöpf-Institute of Organic Chemistry and Biochemistry, Darmstadt  
Technical University, Alarich-Weiss-Strasse 4, D-64287 Darmstadt, Germany
- <sup>9</sup> Department of Chemistry, Clemens-Schöpf-Institute of Organic Chemistry and Biochemistry, Darmstadt  
Technical University, D-30625 Hannover, Germany
- \* Correspondence: Manstein.Dietmar@MH-Hannover.de; Tel.: +49-511-5323700



*thetaitaomicron* VPI-5482 BtDyP (UniProt ID: Q8A8E8), *Rhodococcus jostii* RHA1 RjDyPB (UniProt ID: Q0SE24), *Auricularia auricula-judae* AauDyPI (UniProt ID: I2DBY1), *Bjerkandera adusta* BadDyP (UniProt ID: Q8WZK8)

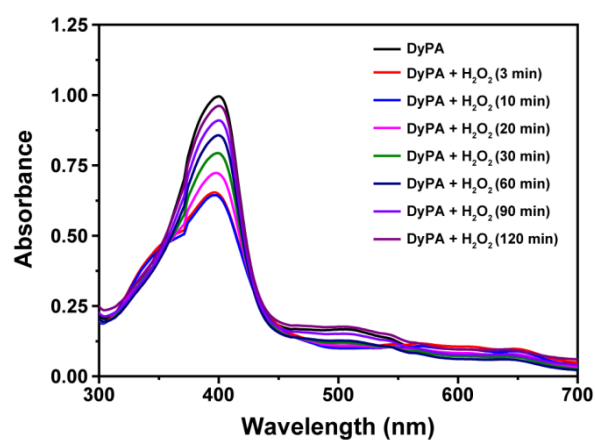

**Figure S2:** UV-visible absorption spectra of *Dictyostelium* DyPA in the presence of H<sub>2</sub>O<sub>2</sub>. Spectra of 10 μM *Dictyostelium* DyPA in the absence (black) or in the presence (red to magenta) of 10 μM H<sub>2</sub>O<sub>2</sub> at different time points. Measurements performed in buffer containing 50 mM Tris pH 8.0, 150 mM NaCl at 23°C.

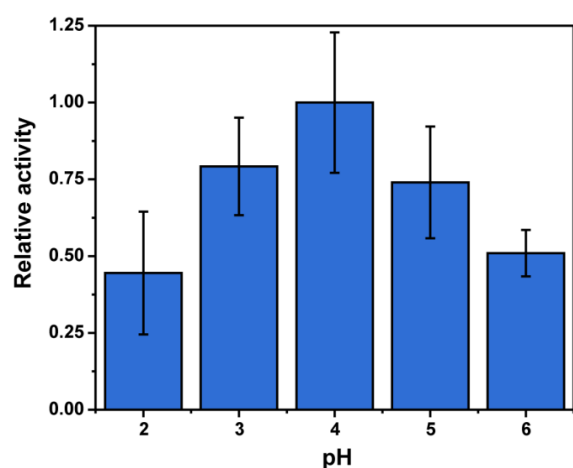

**Figure S3:** Optimum pH for the oxidation of veratryl alcohol by *Dictyostelium* DyPA. Assays were performed in 100 μl of 50 mM sodium acetate (pH 2.0 – 6.0) and 150 mM NaCl at 25 °C, containing 10 mM VA and 4 μM *Dictyostelium* DyPA. Reactions were initiated by the addition of 1 mM H<sub>2</sub>O<sub>2</sub> and monitored at 310 nm (VA $\epsilon_{310}$ = 9.3 mM<sup>-1</sup> cm<sup>-1</sup>). Data are average values of 3–6 independent measurements; bars represent the standard deviation.

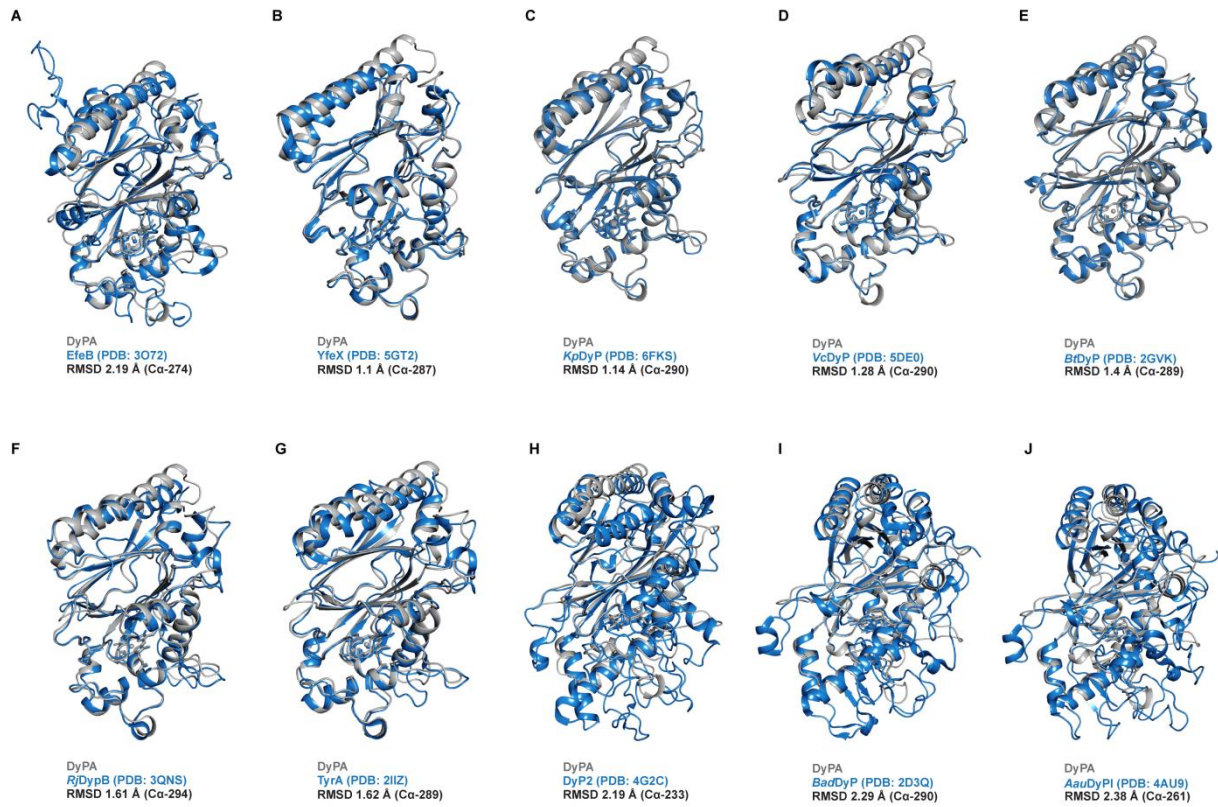

**Figure S4.** Structural comparison of *Dictyostelium* DyPA with related bacterial and fungal dye decolorizing peroxidases. Structural alignment of *Dictyostelium* DyPA (grey) with (A) *Escherichia coli* O157 EfeB (blue; class A). (B) *Escherichia coli* O157 YfeX (blue; class B). (C) *Klebsiella pneumoniae* KpDyP (blue; class B). (D) *Vibrio cholerae* VcDyP (blue; class B). (E) *Bacteroides thetaiotaomicron* VPI-5482 BtDyP (blue; class B). (F) *Rhodococcus jostii* RHA1 RjDypB (blue; class B). (G) *Shewanella oneidensis* TyrA (blue; class B). (H) *Amycolatopsis* sp. 75iv2 DyP2 (blue; class C). (I) *Bjerkandera adusta* BadDyP (blue; class D). (J) *Auricularia auricula-judae* AauDyPI (blue; class D).

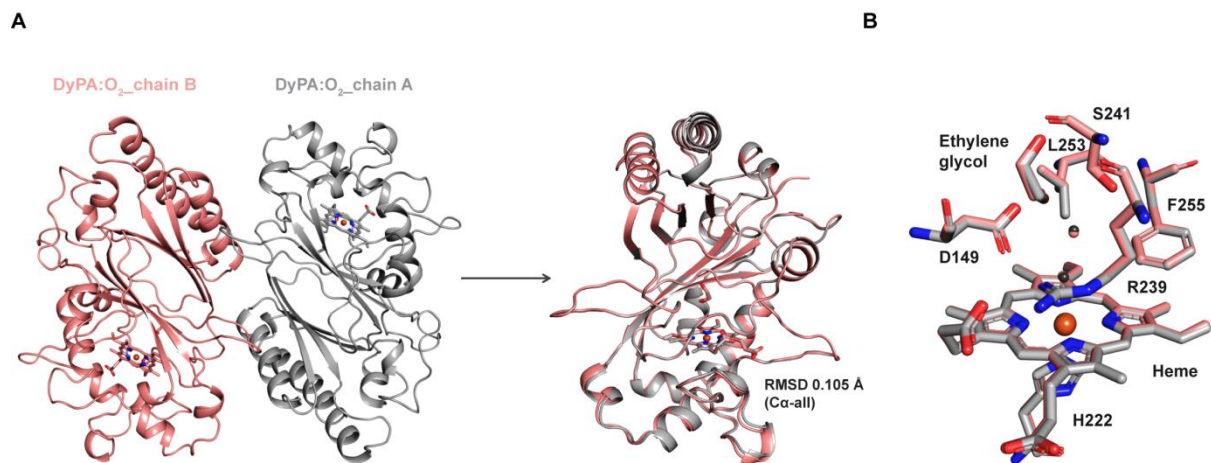

**Figure S5:** Structure of the *Dictyostelium* DyPA:O<sub>2</sub> complex. **(A)** The asymmetric unit contains two nearly identical copies of DyPA, as shown by the overlay of both structural models. **(B)** Heme microenvironment of the *Dictyostelium* DyPA:O<sub>2</sub> complex. Grey/salmon pink spheres show the position of the oxygen atoms in the *Dictyostelium* DyPA:O<sub>2</sub> complex structure.

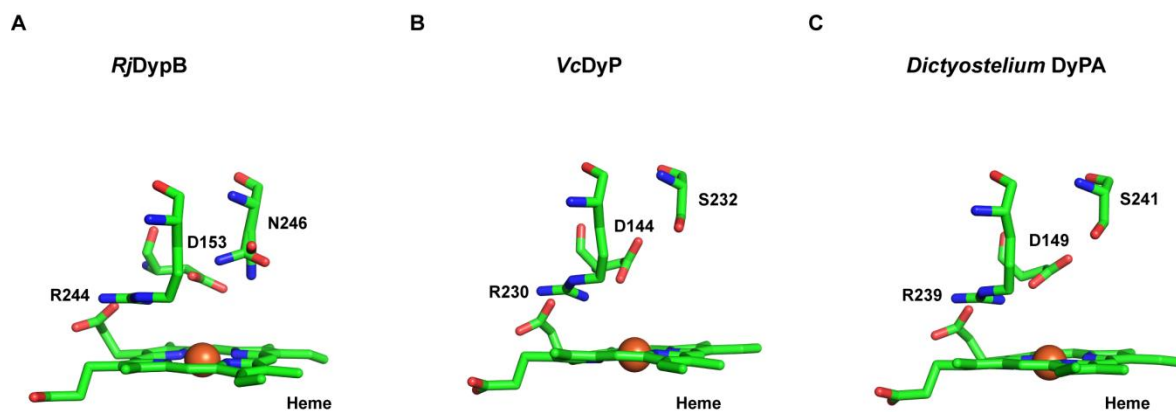

**Figure S6.** Heme microenvironment. **(A)** *RjDypB* (PDB: 3QNS), **(B)** *VcDyP* (PDB: 5DE0) and **(C)** *Dictyostelium* DyPA.



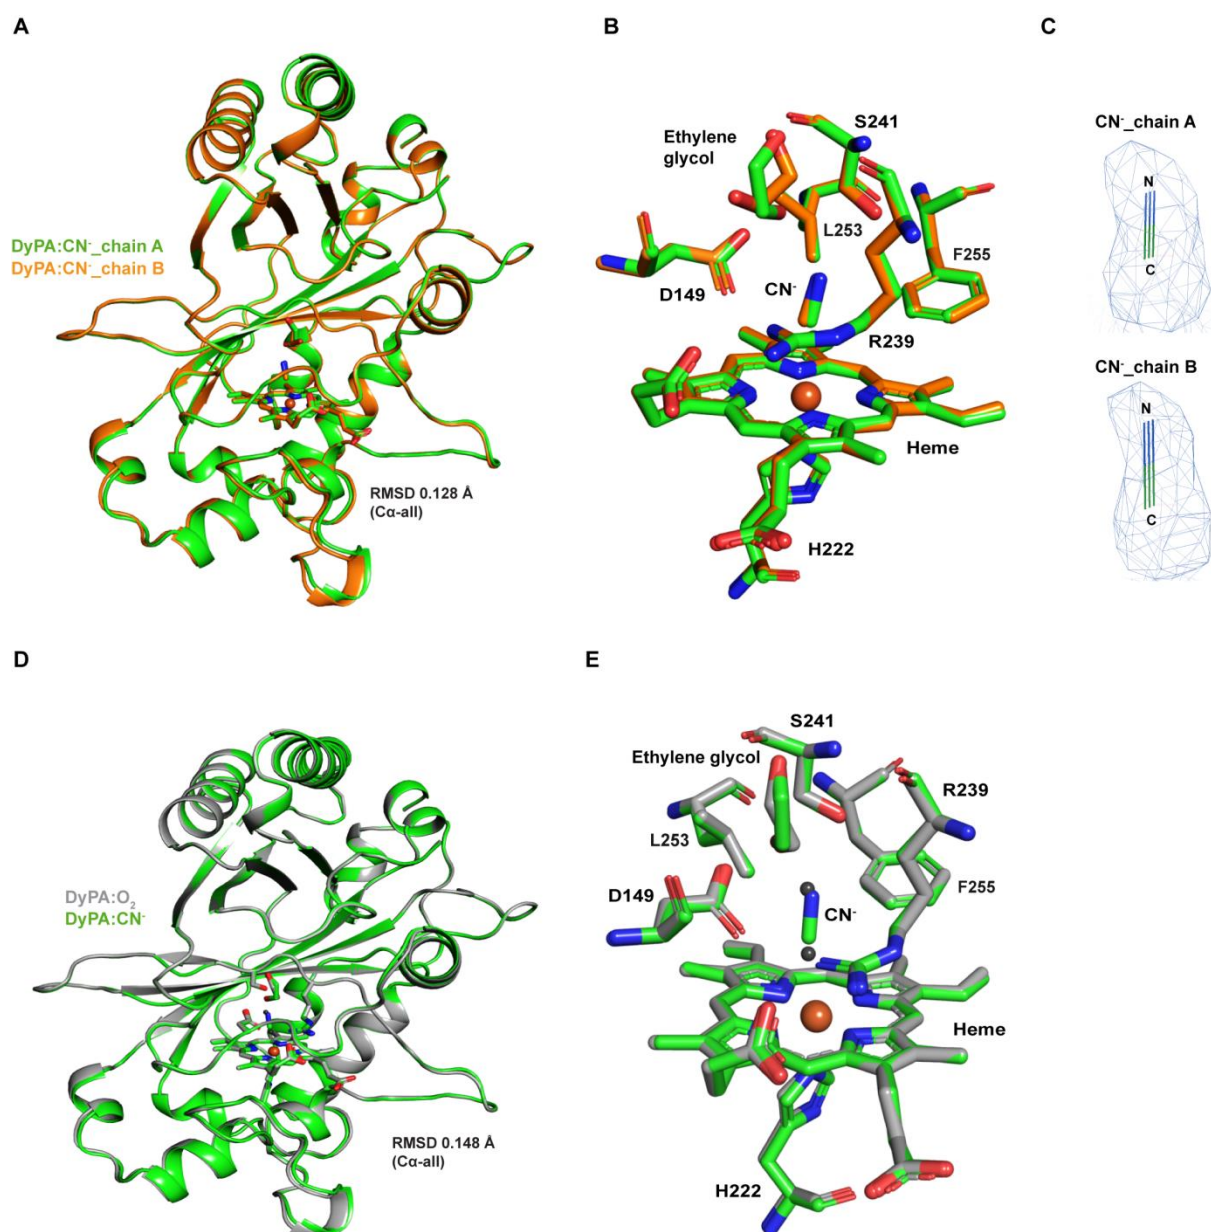

**Figure S7:** Structure of *Dictyostelium* DyPA:CN<sup>-</sup> complex. **(A)** Structural alignment of both copies of the *Dictyostelium* DyPA:CN<sup>-</sup> complex in the asymmetric unit reveals that both copies are nearly identical. **(B)** Heme microenvironment of the *Dictyostelium* DyPA:CN<sup>-</sup>. **(C)** OMIT electron density maps of CN<sup>-</sup> moieties, contoured at 1.5 $\sigma$ . **(D)** Structural alignment of single monomers for the *Dictyostelium* DyPA:O<sub>2</sub> complex structure (grey) and *Dictyostelium* DyPA:CN<sup>-</sup> complex (green). **(E)** Overlay of the heme microenvironment of the *Dictyostelium* DyPA CN<sup>-</sup> (green) and activated O<sub>2</sub> (grey) complexes. The atoms of the activated oxygen molecule are shown as grey spheres and iron atom of the heme is shown as a red sphere, in the *Dictyostelium* DyPA:O<sub>2</sub> complex structure.

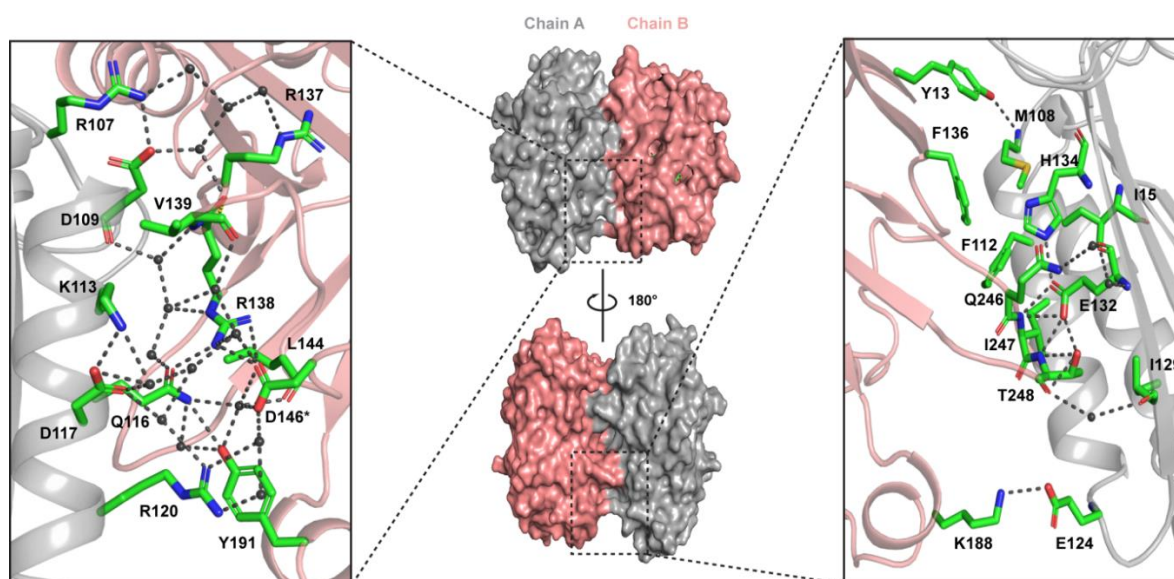

**Figure S8:** *Dictyostelium* DyPA:O<sub>2</sub> complex dimer interface. The individual *Dictyostelium* DyPA monomers are shown in grey and salmon pink. Surface and cartoon representations of *Dictyostelium* DyPA dimer. Selected amino acids are colored in the atomic color scheme. Water molecules are shown as grey spheres. Key non-covalent bonds are represented as grey dashed lines; the bond length cutoff is 3.5 Å.

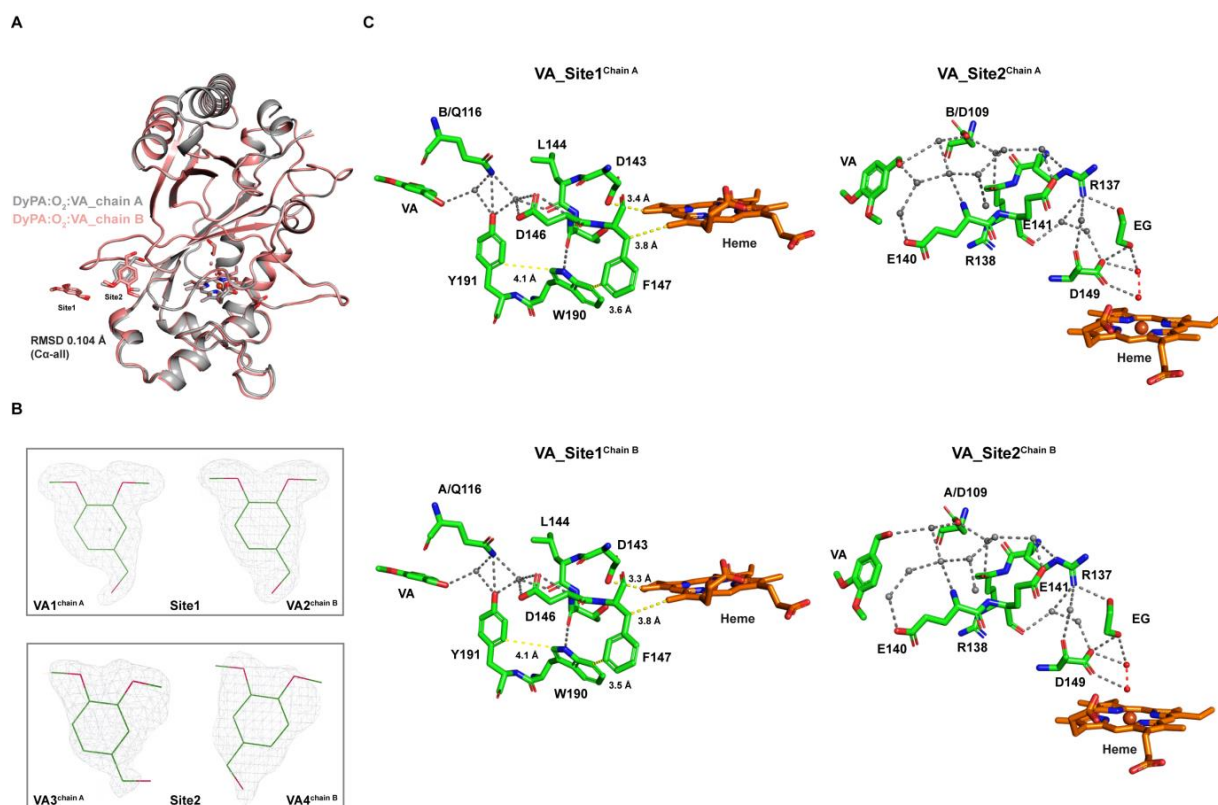

**Figure S9:** Structure of the *Dictyostelium* DyPA:O<sub>2</sub>:VA complex. **(A)** Structure of *Dictyostelium* DyPA:O<sub>2</sub>:VA complex. (A) Structural alignment of both copies of the *Dictyostelium* DyPA:O<sub>2</sub>:VA complex in the asymmetric unit reveals that both copies are nearly identical (C $\alpha$ -RMSD of 0.105 Å). **(B)** OMIT electron density maps for bound VA molecules, contoured at 1 $\sigma$ . **(C)** Proposed long-range electron transfer pathways from veratryl alcohol binding sites to the heme moiety of *Dictyostelium* DyPA. The atoms of the activated oxygen molecules are shown as red spheres and the water molecules are shown as grey spheres. Hydrogen bonds are represented as grey dashed lines.



**Table S1.** Data-collection and refinement statistics

(values in parentheses are for the outer shell).

|                                                       | DyPA:O <sub>2</sub>                      | DyPA:CN <sup>-</sup>                     | DyPA:O <sub>2</sub> :VA                  |
|-------------------------------------------------------|------------------------------------------|------------------------------------------|------------------------------------------|
| <b>Data collection<sup>#</sup></b>                    |                                          |                                          |                                          |
| X-Ray Source                                          | ID29, ESRF Grenoble                      | ID29, ESRF Grenoble                      | ID23-1, ESRF Grenoble                    |
| Wavelength (Å)                                        | 0.91985                                  | 0.91985                                  | 0.910003                                 |
| Crystal-to-detector distance (mm)                     | 313.233                                  | 288.91                                   | 318                                      |
| Exposure time per image (s)                           | 0.0375                                   | 0.0375                                   | 0.0375                                   |
| No. of images                                         | 1200                                     | 1200                                     | 3000                                     |
| Oscillation range (°)                                 | 0.3                                      | 0.3                                      | 0.15                                     |
| Resolution range (Å)                                  | 47.78-1.7(1.79-1.7)                      | 47.74-1.85 (1.94-1.85)                   | 47.64-1.60 (1.63-1.60)                   |
| Space group                                           | <i>P</i> 4 <sub>1</sub> 2 <sub>1</sub> 2 | <i>P</i> 4 <sub>1</sub> 2 <sub>1</sub> 2 | <i>P</i> 4 <sub>1</sub> 2 <sub>1</sub> 2 |
| Unit cell<br>a,b,c (Å)<br>$\alpha, \beta, \gamma$ (°) | 141.03, 141.03, 95.56<br>90, 90, 90      | 141.05, 141.05, 95.48<br>90, 90, 90      | 140.44, 140.44, 95.28<br>90, 90, 90      |
| Crystal mosaicity (°)                                 | 0.13                                     | 0.115                                    | 0.097                                    |
| No. of molecules in AU                                | 2                                        | 2                                        | 2                                        |
| Wilson B-factor                                       | 23.4                                     | 25.8                                     | 21.1                                     |
| Total reflections                                     | 2811648                                  | 2170478                                  | 4163950                                  |
| Unique reflections                                    | 105810                                   | 82374                                    | 125165                                   |
| Multiplicity                                          | 26.6 (25.4)                              | 26.4 (26.2)                              | 33.26 (33.48)                            |
| Completeness (%)                                      | 100 (100)                                | 100 (100)                                | 100 (100)                                |
| Mean I/sigma(I)                                       | 18.5 (2.9)                               | 15.4 (2.9)                               | 25.13 (3.7)                              |
| R <sub>sigma</sub> (%)                                | 3.1 (36.1)                               | 3.9 (36.2)                               | 2.3 (27.9)                               |
| R <sub>int</sub> (%)                                  | 13.67 (77)                               | 15.14 (81)                               | 10.38 (74)                               |
| <b>Refinement</b>                                     |                                          |                                          |                                          |
| Resolution range (Å)                                  | 45.25-1.7                                | 45.22-1.85                               | 45.11-1.60                               |
| Reflections used in refinement                        | 105721                                   | 82292                                    | 125077                                   |
| Reflections used for R-free                           | 5281                                     | 4123                                     | 6292                                     |
| R <sub>work</sub> (%)                                 | 14.71                                    | 15.59                                    | 15.2                                     |
| R <sub>free</sub> (%)                                 | 16.5                                     | 17.99                                    | 16.8                                     |
| <b>Stereochemical parameters</b>                      |                                          |                                          |                                          |
| Number of non-hydrogen atoms                          | 5647                                     | 5429                                     | 5729                                     |
| Macromolecules                                        | 613                                      | 612                                      | 614                                      |
| Ligands                                               | 9                                        | 11                                       | 10                                       |
| Water                                                 | 618                                      | 393                                      | 618                                      |
| R.m.s deviations                                      |                                          |                                          |                                          |
| Bond length (Å)                                       | 0.007                                    | 0.007                                    | 0.006                                    |
| Bond angles (°)                                       | 1.098                                    | 1.103                                    | 1.161                                    |
| Ramachandran plot                                     |                                          |                                          |                                          |
| Favored (%)                                           | 99.18                                    | 99.51                                    | 99.18                                    |
| Additionally allowed (%)                              | 0.82                                     | 0.49                                     | 0.82                                     |
| Outliers (%)                                          | 0                                        | 0                                        | 0                                        |
| B-factors (Å <sup>2</sup> )                           | 30.00                                    | 33.00                                    | 29.00                                    |
| PDB ID                                                | 7O9J                                     | 7O9L                                     | 7ODZ                                     |

<sup>#</sup> R<sub>free</sub> is calculated for a randomly chosen 5 % subset of reflections.
